# Supplementary material
Source: ML conference proceedings conference paper supplement (https://openreview.net/forum?id=sKoazMNH84)
Supplement: supplementary_material [file attachment]

# State Design Matters: How Representations Shape Dynamic Reasoning in Large Language Models

Anonymous authors  
Paper under double-blind review

## 1 Appendix

### Example 1: Agent Prompt

You are an intelligent agent with the goal of succeeding in the game by maximizing the cumulative score. Your decisions should be based on the game manual, the current observation, and your past trajectory.

**# Task:**

1. Analyze the current observation and past trajectory to select the most suitable action that aligns with the game’s objectives and maximizes cumulative rewards.
2. Choose one action from the provided list of actions, starting from index 1, and provide a concise reason for your choice.

**# Response Constraints:**

1. Select only one action from the provided list.
2. Provide reasoning that directly links the chosen action to the game’s objectives and observed patterns.
3. Respond strictly with the action and the reason in the specified format.

**# Response Format:**

Action: [action number]. Reason: [explanation]

**# Input data**

Game Description: {manual}

Current observation: {obs}

Past trajectory: {Full trajectory} OR {Summarized trajectory}

Question: {question}

### Example 2: Summarization Prompt

Your role is to compress the recent trajectory into a concise summary that an agent can reuse next step.

Game Description: {manual}

Recent history (most recent last): {recent\_history}

Previous rolling summary: {previous\_summary}

**Task:**

- Produce a new summary  $\leq 25$  tokens.
- Mention agent location, key items/inventory, goals/hazards, and momentum toward objectives.
- Do not restate every step; only the most salient facts.
- If the history is empty, return “Start of game”.
- Do not only repeat an action, but summarize what actions led to what outcomes.

Respond strictly in this exact format. The summary should be one sentence only, but you can use a comma.

Summary: <concise summary here>



#### Example 5: Hanoi:DictList

'A': [2, 1, 0], 'B': [], 'C': []

#### Example 6: Hanoi:Matrix

[[2, 1, 0], [-1, -1, -1], [-1, -1, -1]]

#### Example 7: Hanoi:TaggedList

- A: |bottom, [2, 1, 0], top|
- B: |bottom, [], top|
- C: |bottom, [], top|

#### Example 8: Messenger:NaturalLanguage

You took action Move North.  
You (agent) already have the message.  
You see:  
- bird 9 steps away  
- ship 9 steps away  
- sword 5 steps away

#### Example 9: Messenger:NaturalLanguagePos

You are an agent with the message. You are currently in position 5, 6. You can see a mage 3 steps to the west, a dog 1 steps to the east, a ball 3 steps to the northwest.

#### Example 10: Messenger: Coordinates

COORDINATE SYSTEM:  
Agent: (5, 5)  
Entities:  
airplane\_0: (5, 3)  
ball\_0: (7, 5)  
queen\_0: (3, 5)

#### Original View:

You (agent) don't have the message.  
You see:  
- airplane 2 steps to your west  
- ball 2 steps to your south  
- queen 2 steps to your north

### Example 11: Messenger:Symbolic

.....  
.....  
.....  
.....  
.....  
.....  
...G.A.M..  
.....

.....E.....  
.....  
.....

Legend:

A=agent(no msg)  
P=agent(with msg)

.=empty

Entities:

E=fish  
M=scientist  
G=robot
